## 1 identifying cancer patients from GC-patterned fragment ends of cell-free DNA

2 Samuel D. Curtis<sup>a,b,c,d,e</sup>, Mahmoud Summers<sup>a,b,c,d</sup>, Joshua D. Cohen<sup>a,b,c,d,f</sup>, Yuxuan Wang<sup>a,b,c,d</sup>, Nadine  
3 Nehme<sup>a,b,c,d</sup>, Maria Popoli<sup>a,b,c,d</sup>, Janine Ptak<sup>a,b,c,d</sup>, Natalie Sillman<sup>a,b,c,d</sup>, Lisa Dobbryn<sup>a,b,c,d</sup>, Adam Buchanan<sup>g</sup>,  
4 Jeanne Tie<sup>h,i,j</sup>, Peter Gibbs<sup>h,i,k</sup>, Lan T. Ho-Pham<sup>l,k</sup>, Bich N. H. Tran<sup>m,n</sup>, Shibin Zhou<sup>a,b,c,d</sup>, Chetan  
5 Bettgowda<sup>a,b,c,o</sup>, Anne Marie Lennon<sup>b,c,p</sup>, Ralph H. Hruban<sup>b,c,q</sup>, Kenneth W. Kinzler<sup>a,b,c</sup>, Nickolas  
6 Papadopoulos<sup>a,b,c</sup>, Bert Vogelstein<sup>a,b,c,d</sup>, Christopher Douville<sup>a,b,c,d,1</sup>

7 <sup>a</sup>Ludwig Center, Johns Hopkins University School of Medicine, Baltimore, MD 21287; <sup>b</sup>Sidney Kimmel Comprehensive Cancer Center, Johns Hopkins University  
8 School of Medicine, Baltimore, MD 21287; <sup>c</sup>Sol Goldman Pancreatic Cancer Research Center, Johns Hopkins University School of Medicine, Baltimore, MD  
9 21287; <sup>d</sup>Howard Hughes Medical Institute, Johns Hopkins Medical Institutions, Baltimore, MD 21287; <sup>e</sup>Department of Pharmacology and Molecular Science,  
10 Johns Hopkins School of Medicine, Baltimore, MD 21287; <sup>f</sup>Department of Biomedical Engineering, Johns Hopkins University, Baltimore, MD 21218; <sup>g</sup>Genomic  
11 Medicine Institute, Geisinger, Danville, PA 17822; <sup>h</sup>Division of Personalised Oncology, Walter and Eliza Hall Institute of Medical Research, Melbourne, Australia;  
12 <sup>i</sup>Department of Medical Oncology, Western Health, Melbourne, Australia; <sup>j</sup>Faculty of Medicine, Dentistry and Health Sciences, University of Melbourne,  
13 Melbourne, Australia; <sup>k</sup>Department of Medical Oncology, Peter MacCallum Cancer Centre, Melbourne, Australia; <sup>l</sup>BioMedical Research Center, Pham Ngoc  
14 Thach University of Medicine; <sup>m</sup>Saigon Precision Medicine Research Center, Vietnam; <sup>n</sup>University of New South Wales, Australia; <sup>o</sup>Department of Neurosurgery,  
15 Johns Hopkins Medical Institutions, Baltimore, MD 21287; <sup>p</sup>Department of Medicine, Johns Hopkins Medical Institutions, Baltimore, MD 21287; <sup>q</sup>Department  
16 of Pathology, Johns Hopkins Medical Institutions, Baltimore, MD 21287.

17 **ABSTRACT:** One of the most intriguing characteristics of cell-free DNA (cfDNA) from plasma is the  
18 sequence at the ends of the fragments. Previous studies have shown that these end-sequences are  
19 somewhat different in cancer patients than in healthy individuals. While investigating this characteristic, we  
20 noticed that the bases at the 5'-ends of a double-stranded fragment were highly correlated with the GC  
21 content of that particular fragment. This led us to develop a method, called MendSeqS (Modified End-based  
22 sequencing System), that incorporates the correlation between end-motifs and GC content into the analysis  
23 of shallow (0.5x) whole genome sequencing (WGS). When applied to plasma samples, MendSeqS was  
24 able to classify patients with a sensitivity of 96% at 98% specificity in a cohort comprised of 107 individuals  
25 evaluated in our laboratory (43 with cancer and 64 without). In cohorts evaluated in three other laboratories,  
26 comprising a total of 401 individuals (193 with cancer and 208 without), MendSeqS achieved a sensitivity  
27 of 87% at 98% specificity. MendSeqS could in principle be combined with other methods of cfDNA analysis  
28 to enhance cancer detection.

## 29 **INTRODUCTION:**

30 The earlier detection of cancer has the potential to substantially reduce cancer morbidity and mortality  
31 because all cancer treatments are more successful when there's a lower tumor burden in the patient<sup>1-2</sup>. The  
32 evaluation of cell-free DNA (cfDNA) from plasma is one of the most promising approaches for such earlier  
33 detection. Numerous ways to use cfDNA have been described in the literature. Genetic alterations in cfDNA  
34 – such as mutations or copy number alterations – have been extensively used for this purpose. Epigenetic  
35 alterations, in particular changes in DNA methylation, have also been used to identify patients with cancer<sup>3-  
36 6</sup>. Other types of epigenetic changes, reflecting chromatin organization rather than covalent modifications  
37 of DNA, have more recently gained attention<sup>3, 7-12</sup>. Because DNA is always wrapped in nucleosomes,  
38 whether in the cell or in the circulation, changes in chromatin structure result in changes of the fragments  
39 produced by nucleases in the cell of origin or in the circulation<sup>11, 13-14</sup>. This gives rise to different  
40 fragmentation patterns as well as differences in fragment sizes or the sequences at the ends of fragments.  
41 Because epigenetics, rather than genetics, is responsible for cell differentiation epigenetic patterns in  
42 plasma cfDNA can often reveal the cell of origin of the fragments.

43 Though the results to date of these cfDNA-based technologies are promising, further research to increase  
44 the sensitivity of cancer detection while maintaining high specificity is a research and clinical priority. We  
45 here report a new heuristic, inspired by previous studies of cfDNA fragmentation patterns in cancer patients,  
46 particularly studies on fragment end-motifs, for classifying patients based on data from shallow whole  
47 genome sequencing<sup>13, 15-17</sup>.

48

## 49 **RESULTS:**

50 We began by evaluating 43 cancer patients and 64 healthy individuals of similar age (Cohort 1, Table 1)  
51 Whole genome sequencing was performed on the cfDNA of each of these patients (Methods) to an average  
52 depth of 17 million high quality reads (~0.5x genome coverage). Two key observations about the sequences  
53 of the bases at the ends of fragments were made during this initial evaluation, which led us to evaluate  
54 more patients and develop algorithms for classifying cancer patients based on them.

### 55 **Observation 1: End-motif frequency is influenced by local GC content**

56 We first found that the frequencies of trimers at the 5'-ends of fragments correlated with the GC content of  
57 the entire fragment (i.e., the 3 base pairs at each of the two ends plus the ~70 to 350 bp (average ~170 bp)  
58 between the trimers). We made similar observations with the two bases at the ends (dimers) or the four  
59 bases at the ends (tetramers), but we focused on trimers in this study. We noticed a few general trends  
60 dependent on the GC content of the particular trimer (Fig. 1 and Supplementary Data 1). The frequency of  
61 fragments with ends containing two A:T bp and one G:C bp were *negatively* correlated with the GC content  
62 of the entire fragment (e.g., Fig. 1A). Conversely, the frequency of fragments with ends containing one A:T  
63 bp and two G:C bp were *positively* correlated with the GC content of the entire fragment (e.g., Fig. 1B).  
64 Figure 1C illustrates the trend when the trimer composition was extreme, with G:C bp at all three positions.  
65 Though a positive correlation with of the frequency of the extreme type of trimer and the GC content of the  
66 entire fragment was still evident, the relationship was exponential rather than linear. These trends were  
67 observed in plasma cfDNA derived from healthy individuals as well as from cancer patients in Cohort 1 (Fig.  
68 1A to 1D) as well as in publicly available data<sup>18</sup> (Fig 1 E to 1H). The GC-dependent frequencies of all 64  
69 trimers in the cohorts used in this study are presented in Supplementary Table 2. To test whether these  
70 trends were specific to cell-free DNA, we performed in silico shearing of the hg19 reference genome. When  
71 the human genome was randomly sheared to the same fragment size distribution as cfDNA, the trends in  
72 end-motif trimer frequency as a function of GC content were similar to those of actual cfDNA (Fig 1 I to 1L).

73

74

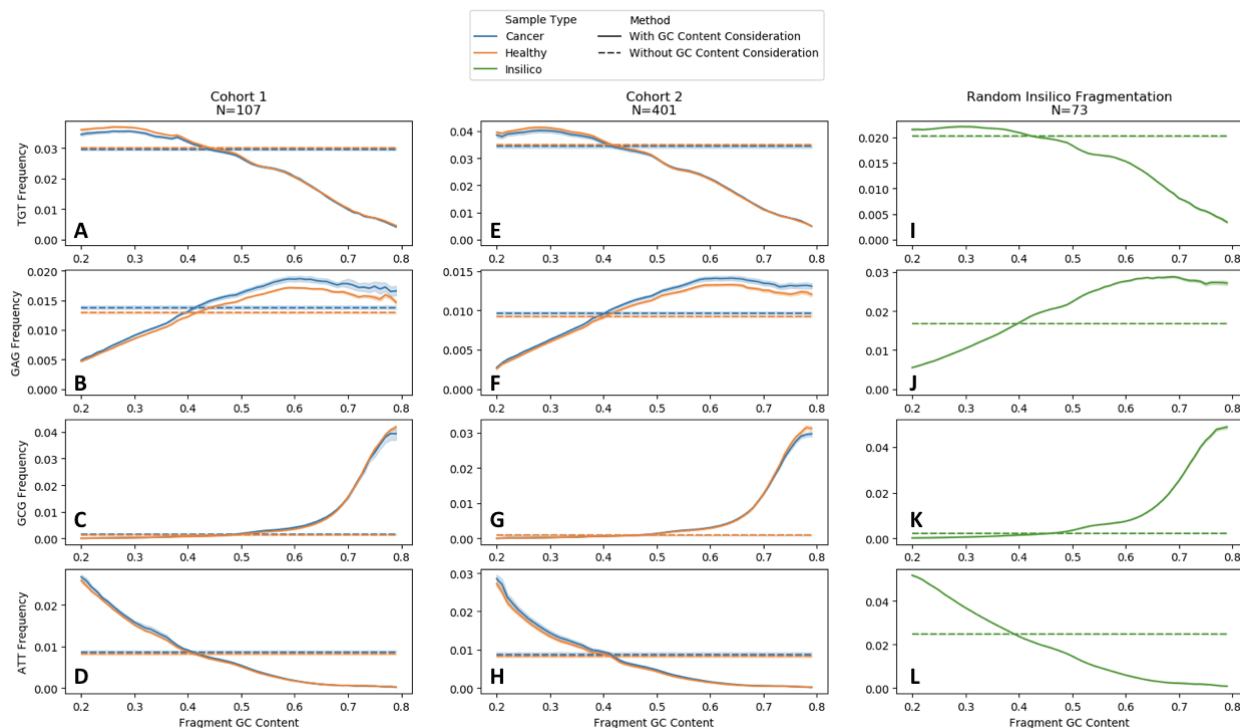

**Figure 1. Correlations between end-motif frequencies and GC-contents of the fragment from which the ends were derived.** (A-D) End-motif trimer frequencies in healthy individuals and cancer patients in Cohort 1. The dotted lines represent the frequencies of the indicated end-motif trimers regardless of the GC content of the fragment from which the trimer was derived and are therefore horizontal lines in this plot. The solid lines represent the frequencies of the indicated trimers as a function of the GC content (x-axis) of the fragments containing them. (E-H) Similar patterns were observed in cfDNA samples from Cohort 3 and in in silico-generated fragments from the hg19 genome (I-L).

76

77 **Observation 2: Binning end-motifs by fragment GC content improves the distinction between**  
78 **healthy individuals and cancer patients**

79 It has previously been demonstrated that the frequencies of trimers at the 5'-ends of cfDNA fragments from  
80 healthy individuals is different than those derived from patients with cancer<sup>13, 17, 19-20</sup>. In this study, we  
81 observed that cancer-specific differences in end-motifs are substantially more pronounced if the GC content  
82 of the entire fragment is taken into account. This is illustrated in Fig. 2 for each of the four trimers shown in  
83 Fig. 1. For each trimer, the frequency of fragments containing that trimer was determined from the WGS  
84 data of Cohort 1. Using the frequencies in the 64 healthy individuals in this cohort as a reference distribution,  
85 Z-scores for each sample in Cohort 1 could be calculated, with a Z-score of zero corresponding to the  
86 average frequency of that trimer in the healthy individuals. The average Z-scores for the 43 cancer patients  
87 in Cohort 1 are represented by the horizontal blue lines in Fig. 2. Similarly, Z-scores could be calculated for  
88 each trimer present in bins of fragments with similar GC contents. Sixty such Z-scores were obtained for  
89 each trimer, corresponding to bins of 20% to 21% GC content, 21% to 22%, etc. all the way up to 79% to  
90 80%. The average Z-scores for the 43 cancer patients in Cohort 1, as a function of the GC content of the  
91 underlying fragment (x-axis) are represented by the orange lines in Fig. 2.

92 As an example, with trimer TGT the average Z-score was -0.619 without consideration of GC (blue line in  
93 Fig. 2A) while the average Z-scores ranged from -2.0 in fragments with a GC content of 29% to +0.6 in  
94 fragments with a GC content of 60% (orange line in Fig. 2A). The maximum absolute Z-score for the TGT  
95 trimer, when considering GC contents, was three times as high as the Z-score for the same trimer when  
96 GC contents were not considered. This translated to an improved distinction between cancer patients and  
97 healthy individuals with TGT trimers (Mann-Whitney p-values of 1.1e-11 vs. 0.002 with and without GC  
98 content consideration, respectively; Supplementary Table 2).

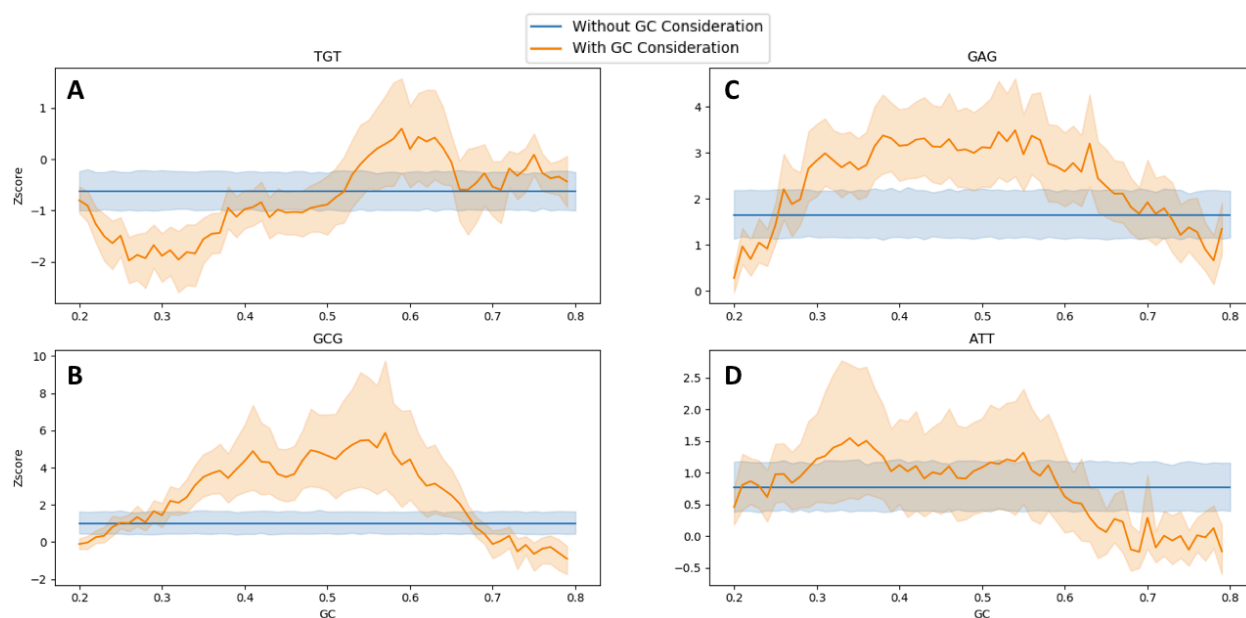

99

**Figure 2. Comparisons of end-motif trimer frequencies in cDNA fragments from cancer patients and healthy individuals with or without consideration of GC content.** Average Z-scores (lines) and 95% confidence intervals (shaded) are shown for the 22 cancer patients in Cohort 1, using the trimer frequencies in the 64 healthy individuals in Cohort 1 as references. (A) Z-scores for TGT; (B) Z-scores for GCG (C); Z-scores for GAG; (D) Z-scores for ATT.

100

101 The distinction between cancer patients and normal individuals was also observed with trimers GAG and  
102 GCG, though the patterns were different (Fig. 2B, C). At low or high fragment GC contents, these trimers  
103 displayed relatively low Z-scores, with no improvement in Z-scores evident after consideration of GC  
104 content. However, at GC contents between 35% and 65%, there was a large increase in Z-scores when  
105 GC contents were considered, with mean Z-scores as high as 5.9 and 3.5 for GCG and GAG, respectively  
106 – as much as three-fold higher than obtained without consideration of GC content. As with the TGT trimer,  
107 this translated to an improved distinction between samples from cancer patients and healthy individuals  
108 (Mann-Whitney p-values of  $8.3e-14$  vs.  $5.7e-5$  with and without GC content consideration, respectively, for  
109 GCG;  $3.3e-14$  with GC content vs.  $3.3e-8$  with and without GC content consideration, respectively, for GAG,  
110 Supplementary Table 2).

111 Fig 2D illustrates a trimer (ATT) in which there is relatively little change in the Z-scores as a function of GC  
112 content of the fragment. However, there were still cancer-specific differences in the frequencies of ATT  
113 end-motifs, with a max z-score of 1.55 with GC content consideration and mean Z-score of 0.77 without  
114 GC content consideration (Mann-Whitney p-values of  $5.4e-05$  and 0.006 with and without GC content  
115 consideration, respectively; Supplementary Table 2).

116 **A classifier.** Based on the two observations described above, it was clear that a subset of trimers exhibited  
117 GC-dependent, cancer-associated differences in frequencies. To incorporate the relationship between GC  
118 content and trimer frequencies into a classifier, we performed feature selection on the basis of their mutual  
119 information and Mann-Whitney p-values using leave-one-out cross validation. We thereby selected an  
120 average of 2293 features from the set of 3840 possible features (64 trimers x 60 GC intervals; Table 2 and  
121 Methods). These 2293 features included all 64 trimers and an average of 36 GC contents per trimer. To  
122 avoid information leakage, all feature selections were performed within each fold of cross-validation. This  
123 heuristic was named MendSeqS, for Modified end-based Sequencing System. For comparison, we  
124 selected 47 trimers using the same criteria (Mutual Information and Mann Whitney p-values) without  
125 considering GC content of the underlying fragments, referring to this conventional heuristic as EndSeqS  
126 (Table 3). We then used logistic regression to assign weights (coefficients) to each of the selected features  
127 in MendSeqS and EndSeqS. Logistic regression yielded a single score for each heuristic in each patient  
128 (Fig. 3A). The most obvious difference between the performance of MendSeqS and EndSeqS was the  
129 tighter distribution of scores in MendSeqS (Fig. 3A). This translated to a lower binary cross-entropy in  
130 MendSeqS (0.16) than in EndSeqS (0.21) (Methods). MendSeqS also was significantly more accurate than  
131 EndSeqS in ROC analysis (p-value of 0.015, Venkatraman's test<sup>22</sup>, Fig. 3B). This improvement was  
132 particularly significant in the high specificity realm most important for earlier detection, where MendSeqS  
133 achieved a sensitivity of 95% (41/43) at 98% specificity whereas EndSeqS achieved a sensitivity of only  
134 84% (36/43) (p-value of 0.024, Pepe's test<sup>23</sup>, Fig. 3C).

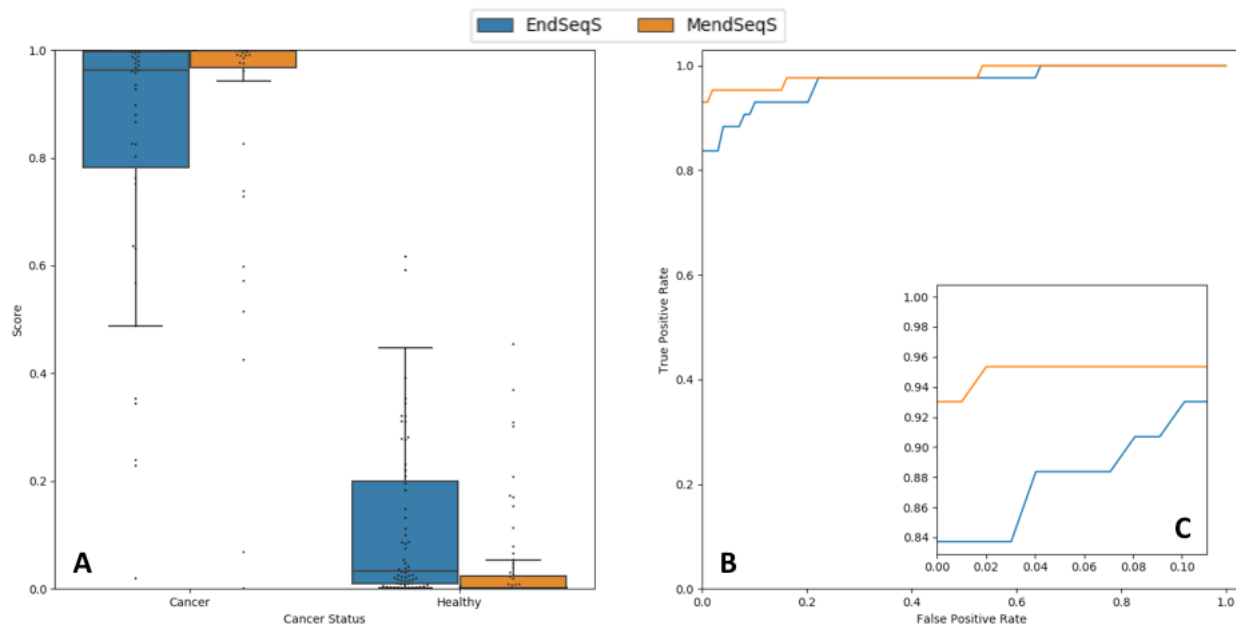

135

**Figure 3. Performance of MendSeqS and EndSeqS on Cohort 1.** (A) Box and swarm plots display the scores for MendSeqS and EndSeqS from leave one-out cross-validation. (B) Comparison of ROC curves from MendSeqS and EndSeqS during cross-validation (C) ROC at high specificity, representing the upper left part of (B).

136

137 **Analysis of other WGS datasets.** We then sought to see if MendSeqS could be applied to DNA samples  
138 that had been prepared, amplified, and sequenced in other laboratories. For this purpose, we employed  
139 401 samples (193 with cancer, 208 without cancer) deposited in the FinaleDB public database<sup>18</sup> (called  
140 Cohort 2, Table 4) from three separate studies, each using different technologies<sup>9, 11, 24</sup>. The cancer types  
141 represented in Cohort 2 were different than those in Cohort 1 (compare Table 1 with Table 4).

142 The first question addressed was whether the two basic observations that formed the rationale for  
143 MendSeqS were apparent in Cohort 2. With respect to Observation 1, the data in Figures 1E-H show a  
144 strong GC-dependence of the frequencies of the same four trimers illustrated in Figs 1A-D, and this was  
145 true for all 64 trimers (Supplementary Data 1).

146 With respect to Observation 2, the key question was whether MendSeqS could improve the classification  
147 of cancer samples in Cohort 2 over that achieved with EndSeqS. Because the sample types and methods  
148 used for DNA purification, library preparation, and sequencing analysis were heterogeneous in Cohort 2  
149 and different than in Cohort 1, we derived new features and coefficients for Cohort 2 and evaluated them  
150 using leave one-out cross-validation (just as done for Cohort 1). For MendSeqS in Cohort 2, we selected  
151 an average of 2414 features (64 trimers x average of 38 GC contents per primer) from the set of 3840  
152 possible features (Table 5). For EndSeqS, we selected all 51 using the same criteria (Table 6, Methods).

153 Dot plots of the scores of the four cancer types obtained with MendSeqS and EndSeqS are plotted in Fig.  
154 4A, where the tighter distribution of MendSeqS scores was again observed. MendSeqS also was more  
155 accurate than EndSeqS in ROC analysis (p-value of 0.054, Venkatraman's test<sup>22</sup>, Fig. 4B). This  
156 improvement was particularly significant in the high specificity realm most important for earlier detection,  
157 where MendSeqS achieved a sensitivity of 87% (168/193) at 98% specificity, whereas EndSeqS was less  
158 sensitive at the same specificity (68% [131/193], p-value of 0.0087, Pepe's test<sup>23</sup>, Fig. 4C).

159



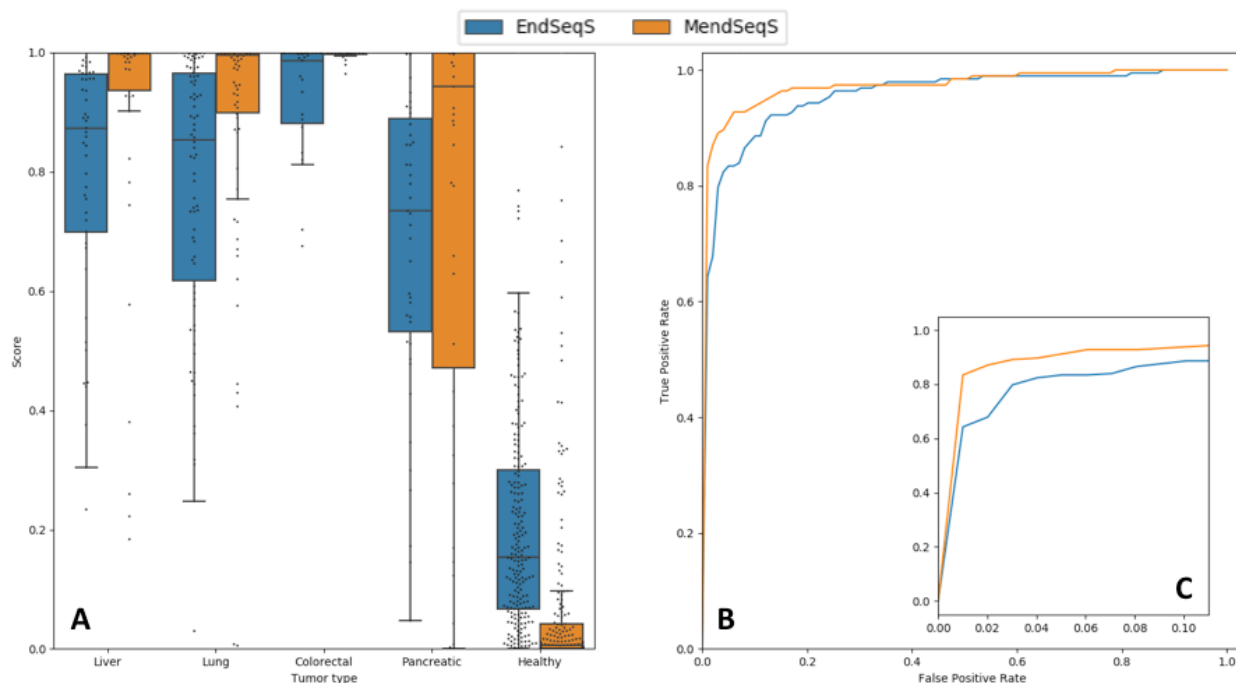

160

**Figure 4. Performance of MendSeqS and EndSeqS on Cohort 2.** (A) Scores from leave one-out cross-validation for four tumor types and healthy samples are shown. (B) ROC curves displaying the performance across the 10 iterations of cross-validation. (C) ROC at high specificity, taken from the upper left part of (B).

161

## 162 **Discussion**

163 The results described above demonstrate that the distributions of trimers at the 5' ends of cfDNA fragments  
164 are influenced by the GC content of the fragment from which those ends were derived. Moreover, taking  
165 this GC dependency into account can magnify the differences in trimer frequency between cancer patients  
166 and healthy individuals, resulting in improved classification performance.

167 The GC dependence of trimers was observed in samples from both cancer patients and healthy controls.  
168 The similarity of the trends as seen in cell-free DNA and *in silico* fragmentation experiments indicate that  
169 these trends reflect the influence of local GC content on the frequency of each end-motif (Fig. 11-L;  
170 Methods). Moreover, while the overall shapes of the curves relating to end-motif frequency and fragment  
171 GC content are observed in experimental data (Cohorts 1 and 3), and in *in silico* fragmentation, their  
172 magnitude is different. Note, for example, that the y-axes are different in Fig 1A, 1E, and 1I. Previous studies  
173 have shown that the distribution of fragment-end motifs are influenced by the activity of sequence specific  
174 nucleases such as DNASE1, DNASE1L3, and DFFB<sup>25-26</sup> as well as chromatin organization, with DNA  
175 wrapped around nucleosomes less susceptible to cleavage than internucleosomal regions<sup>11, 27</sup>. Our results  
176 illustrate that the frequency of end-motifs is also heavily influenced by GC content of the region itself,  
177 implying that phenomena such as PCR biases and copy number changes may add significant noise to the  
178 overall end-motif frequency. Through the binning of end-motifs by GC content, it is possible to disaggregate  
179 the signal derived from fragments of varying GC content, allowing MendSeqS to overcome these  
180 confounders.

181 Several prior studies have documented the utility of cancer-specific differences in trimers or other motifs at  
182 the ends of cfDNA fragments for cancer detection<sup>13, 17, 19-20</sup>. MendSeqS amplifies these differences, as  
183 documented by higher Z-scores, p-values, and mutual information when GC content of fragments are  
184 considered (Supplementary Table 2). There are at least three possible explanations for these cancer-  
185 specific differences. The activities of sequence-specific nucleases that produce cfDNA fragments in  
186 neoplastic cells may not be identical to those in non-neoplastic cells. For example, DFFB, associated with

187 certain forms of cell death, could be more active in a subset of neoplastic cells<sup>3, 25-26, 28</sup>. Second, DNA from  
188 neoplastic cells could be more fragmented as a result of unrepaired DNA damage by exogenous or  
189 endogenous sources of DNA damage (e.g. chemical insults, radiation, free radicals, topological changes)  
190 which may lead to changes in the distribution of end-motifs.<sup>8, 13, 20</sup> Third, differences in chromatin structure  
191 between neoplastic and non-neoplastic cells are known to alter the fragmentation patterns of cell-free DNA  
192 and could explain both cell-type specific and cancer-specific changes<sup>7-8, 11, 14, 29-31</sup>. Further research will be  
193 required to determine the relative importance of these three potential explanations.

194 Note that in the proposed explanations above we are *assuming* that the cancer-specific differences in  
195 trimers are the result of contributions of cfDNA derived from neoplastic cells. In fact, neither our data nor  
196 prior evidence provide unequivocal evidence that the fragments whose ends give rise to the cancer-specific  
197 signal are actually derived from cancer cells. They could be derived from non-cancer cells of the organ  
198 giving rise to the cancer, or from leukocytes or other cells that are simply associated with cancer.

199 Our study of course has limitations. Among them, our cohorts were relatively small so the confidence limits  
200 in the estimates of sensitivity and specificity derived from the ROC curves are relatively wide. Second, in  
201 the ideal situation, the selected features and the logistic regression coefficients associated with each feature  
202 should be broadly applicable to all cohorts. However, when we applied the features and coefficients derived  
203 from the analysis of data generated in other laboratories (Cohort 2) to those generated in our laboratory  
204 (Cohort 1), the MendSeqS sensitivity at 95% specificity dropped from 92% to 23.1%. This drop in sensitivity  
205 was also observed in EndSeqS, dropping from 89% to 18.1% when features from Cohort 1 rather than  
206 Cohort 2 were used. Therefore, the decreased performance was not likely to be a result of the new  
207 heuristics employed in MendSeqS. The most obvious basis for the difference in performance is that the  
208 sample preparation, DNA library construction, and sequencing methods – factors that are known to  
209 influence characteristics of cell-free DNA<sup>32-35</sup> – used in Cohort 2 were different than those used to in Cohort  
210 1. The enzymes used to make WGS libraries often employ nucleases and polymerases that can alter the  
211 bases at the ends of fragments in preparation for ligation, so this explanation is plausible. If true, it would  
212 suggest that the parameters for GC adjustment used in a training set should be derived from control libraries  
213 made identically to those used in the validation set. However, it is also possible that these performance  
214 differences were representative of differences between tumor types in Cohort 2 (Liver, Lung, Pancreas,  
215 and Colorectal) compared to Cohort 1 (predominately Colorectal), or to other confounders. Regardless,  
216 studies with more patients, and with different types of library constructions on the same patients, should be  
217 able to address this issue in the future.

218 In summary, we demonstrate that the frequency and cancer-specificity of a cfDNA fragment end-motif are  
219 correlated with the GC content of the fragment from which the was derived. We anticipate that the principles  
220 on which MendSeqS is based can be incorporated into the analysis of cfDNA in general and can serve as  
221 an adjunct to other assays performed on the same cfDNA, such as mutations, methylation, fragment length,  
222 and chromatin accessibility.

## 223 **Methods**

### 224 *Plasma Collection and DNA Collection*

225 This study was approved by the Institutional Review Boards for Human Research at participating institutions  
226 in compliance with the Health Insurance Portability and Accountability Act. All the participants provided  
227 written informed consent in accordance with the principles of the Declaration of Helsinki. DNA was purified  
228 from an average of 1 to 10 mL of plasma using either a QIASymphony circulating DNA kit (cat # 1091063)  
229 or a BioChain Cell-free DNA Extraction kit (Cat # K5011625).

### 230 *Library Preparation and Sequencing*

231 All libraries were prepared as described in ref.<sup>36</sup>. Barcoded libraries were sequenced using 75 bp paired-  
232 end runs (150 cycles) on either Illumina HiSeq 4000 or Novaseq 6000 platforms to an average depth of 17  
233 million molecules. Adapters and UMIs were trimmed using cutadapt<sup>37</sup> and trimmed sequences were aligned

234 to the hg19 genome using bowtie<sup>238</sup> in paired-end mode. Reads were filtered for a MAPQ>1 and duplicates  
235 were removed using unique molecular identifiers (UMIs). Paired-end reads that did not have proper  
236 orientation or did not have paired-end support were removed.

### 237 *Fragment-End Analysis*

238 Fragmentation data was collected from filtered SAM files. For each pair of reads the fragment start, end,  
239 and strand alignment was determined. Bedtools<sup>39</sup> was then used to sort fragments and extract the full insert  
240 sequence using the hg19 reference genome. GC content for each insert was then calculated using all bases  
241 of the aligned sequence.

242 For every unique molecule the first (5') and last (3') nucleotides of the fragment sequence were evaluated  
243 and the frequency of each motif at each end was determined. Our library preparation either degrades the  
244 3' end of the original DNA duplex fragment when there is a 3'-overhang or fills-in a 5' overhang with the  
245 compliment of the 3' strand. We therefore used the end-motif (trimer) itself when the sequence read aligned  
246 to the reference strand of the genome, and the reverse compliment of the trimer when the sequence read  
247 aligned with the reverse compliment of the reference strand.

248 We binned each fragment based on the GC content of the sequence of the entire aligned read; when only  
249 part of a read aligned to the reference genome, it was discarded. GC bins extended from 20% to 21% GC,  
250 21% to 22% GC, etc. up to 79 to 80% GC. Thus there were 60 possible bins and 64 possible trimers, for a  
251 total of 3840 possible features used for MendSeqS.

### 252 *In silico fragmentation of the hg19 genome*

253 We extracted fragments from 74 healthy controls and placed them randomly throughout the hg19 genome  
254 using the bedtools random function<sup>39</sup>. For example, if sample A had 2000 fragments of length X we placed  
255 2000 fragments of length X randomly throughout the hg19 genome.

### 256 *Analysis of FinaleDB samples*

257 Fragmentation data was downloaded for 352 patients from the FinaleDB database<sup>18</sup>. Data files were  
258 downloaded in sorted tsv format and contained fragment-end positioning (chr,start,end) and strand  
259 alignment. Fragment-end analysis was performed as described above.

### 260 *Classification Algorithm*

261 For each potential feature, we used the data within the training set (all but one of the samples) to create a  
262 StandardScaler model (sklearn) to standardize features by removing the mean and scaling to unit variance.  
263 Next, we evaluated (1) the mutual information between feature values and cancer status and (2) the Mann-  
264 Whitney p-value for feature values of healthy controls vs. cancer samples (Tables 2, 3, 5, and 6). To remove  
265 uninformative features, we filtered for features that had either (a) mutual information greater than 0.05 or  
266 (b) a p-value that remained statistically significant (i.e., < E-5) after Bonferonni correction ( $\alpha=0.05$ ). Logistic  
267 regression was then used to determine the coefficient of each feature that surpassed these thresholds.  
268 Finally, these coefficients were used to score the left out sample in each fold of cross-validation. Note that  
269 both feature selection and coefficient determination were determined in each fold of cross-validation to  
270 avoid data leakage during feature selection<sup>21</sup>. After completing all folds, we calculated the binary cross-  
271 entropy, AUROC and sensitivity at 98% specificity. This workflow was identical for both MendSeqS and  
272 EndSeqS.

### 273 *Code Availability*

274 Scripts for analyzing bed files and evaluating logistic regressions are available under a GNU 3.0 public  
275 license at <https://github.com/sdcurtis/LudwigCenterBaltimore/tree/main>

276



277

278 *Data availability*

279 The sequencing data generated in this study can be obtained from the European Genome–phenome  
280 Archive (accession number EGAS00001006418)

281 *Conflicts of Interest*

282 BV, KWK, & NP are founders of Thrive Earlier Detection, an Exact Sciences Company. KWK, NP, & CD  
283 are consultants to Thrive Earlier Detection. BV, KWK, NP, SZ, and CD hold equity in Exact Sciences. BV,  
284 KWK, NP, and SZ, are founders of or consultants to and own equity in ManaT Bio., Haystack Oncology,  
285 Neophore, CAGE Pharma and Personal Genome Diagnostics. NP is consultant to Vidium. PG and JT are  
286 consultants to Haystack Oncology. BV is a consultant to and holds equity in Catalio Capital Management  
287 SZ has a research agreement with BioMed Valley Discoveries, Inc. CB is a consultant to Depuy-Synthes,  
288 Bionaut Labs, Haystack Oncology and Galectin Therapeutics. CB is a co-founder of OrisDx. The companies  
289 named above, as well as other companies, have licensed previously described technologies related to the  
290 work described in this paper from Johns Hopkins University. BV, KWK, NP, JDC, and CD are inventors on  
291 some of these technologies. Licenses to these technologies are or will be associated with equity or royalty  
292 payments to the inventors as well as to Johns Hopkins University. Patent applications on the work described  
293 in this paper may be filed by Johns Hopkins University. The terms of all these arrangements are being  
294 managed by Johns Hopkins University in accordance with its conflict of interest policies.

295 *Funding*

296 This work was supported by The Lustgarten Foundation for Pancreatic Cancer Research, The Virginia and  
297 D.K. Ludwig Fund for Cancer Research, The Conrad N. Hilton Foundation, The Sol Goldman Charitable  
298 Foundation, and National Institutes of Health grants (T32 GM008752, U01 CA200469, U01 CA62924, T32  
299 GM136577, U01 CA06973, T32 GM135083, and T32 GM007814).

300 *References*

301

- 302 1. Vogelstein, B.; Papadopoulos, N.; Velculescu Victor, E.; Zhou, S.; Diaz Luis, A.; Kinzler Kenneth, W.,  
303 Cancer Genome Landscapes. *Science* **2013**, *339* (6127), 1546-1558.
- 304 2. Hubbell, E.; Clarke, C. A.; Aravanis, A. M.; Berg, C. D., Modeled Reductions in Late-stage Cancer  
305 with a Multi-Cancer Early Detection Test. *Cancer Epidemiology, Biomarkers & Prevention* **2021**, *30* (3),  
306 460-468.
- 307 3. Lo, Y. M. D.; Han Diana, S. C.; Jiang, P.; Chiu Rossa, W. K., Epigenetics, fragmentomics, and topology  
308 of cell-free DNA in liquid biopsies. *Science* **2021**, *372* (6538), eaaw3616.
- 309 4. Galardi, F.; Luca, F.; Romagnoli, D.; Biagioni, C.; Moretti, E.; Biganzoli, L.; Leo, A. D.; Migliaccio, I.;  
310 Malorni, L.; Benelli, M., Cell-Free DNA-Methylation-Based Methods and Applications in Oncology.  
311 *Biomolecules* **2020**, *10* (12).
- 312 5. Oxnard, G. R.; Klein, E. A.; Seiden, M. V.; Hubbell, E.; Venn, O.; Jamshidi, A.; Zhang, N.; Beausang,  
313 J. F.; Gross, S.; Kurtzman, K. N.; Fung, E. T.; Allen, B.; Fields, A. P.; Liu, H.; Sekeres, M. A.; Richards, D. A.;  
314 Yu, P. P.; Aravanis, A. M.; Hartman, A. R.; Liu, M. C., Simultaneous multi-cancer detection and tissue of  
315 origin (TOO) localization using targeted bisulfite sequencing of plasma cell-free DNA (cfDNA). *Annals of*  
316 *Oncology* **2019**, *30*.
- 317 6. Moss, J.; Magenheim, J.; Neiman, D.; Zemmour, H.; Loyfer, N.; Korach, A.; Samet, Y.; Maoz, M.;  
318 Druid, H.; Arner, P.; Fu, K. Y.; Kiss, E.; Spalding, K. L.; Landesberg, G.; Zick, A.; Grinshpun, A.; Shapiro, A. M.  
319 J.; Grompe, M.; Wittenberg, A. D.; Glaser, B.; Shemer, R.; Kaplan, T.; Dor, Y., Comprehensive human cell-  
320 type methylation atlas reveals origins of circulating cell-free DNA in health and disease. *Nat Commun*  
321 **2018**, *9* (1), 5068.

- 322 7. Ding, S. C.; Lo, Y. M. D., Cell-Free DNA Fragmentomics in Liquid Biopsy. *Diagnostics (Basel)* **2022**,  
323 12 (4).
- 324 8. Esfahani, M. S.; Hamilton, E. G.; Mehrmohamadi, M.; Nabet, B. Y.; Alig, S. K.; King, D. A.; Steen, C.  
325 B.; Macaulay, C. W.; Schultz, A.; Nesselbush, M. C.; Soo, J.; Schroers-Martin, J. G.; Chen, B.; Binkley, M. S.;  
326 Stehr, H.; Chabon, J. J.; Sworder, B. J.; Hui, A. B. Y.; Frank, M. J.; Moding, E. J.; Liu, C. L.; Newman, A. M.;  
327 Isbell, J. M.; Rudin, C. M.; Li, B. T.; Kurtz, D. M.; Diehn, M.; Alizadeh, A. A., Inferring gene expression from  
328 cell-free DNA fragmentation profiles. *Nature Biotechnology* **2022**, 40 (4), 585-597.
- 329 9. Cristiano, S.; Leal, A.; Phallen, J.; Fiksel, J.; Adleff, V.; Bruhm, D. C.; Jensen, S. Ø.; Medina, J. E.;  
330 Hruban, C.; White, J. R.; Palsgrove, D. N.; Niknafs, N.; Anagnostou, V.; Forde, P.; Naidoo, J.; Marrone, K.;  
331 Brahmer, J.; Woodward, B. D.; Husain, H.; van Rooijen, K. L.; Ørntoft, M.-B. W.; Madsen, A. H.; van de  
332 Velde, C. J. H.; Verheij, M.; Cats, A.; Punt, C. J. A.; Vink, G. R.; van Grieken, N. C. T.; Koopman, M.; Fijneman,  
333 R. J. A.; Johansen, J. S.; Nielsen, H. J.; Meijer, G. A.; Andersen, C. L.; Scharpf, R. B.; Velculescu, V. E.,  
334 Genome-wide cell-free DNA fragmentation in patients with cancer. *Nature* **2019**, 570 (7761), 385-389.
- 335 10. Ulz, P.; Perakis, S.; Zhou, Q.; Moser, T.; Belic, J.; Lazzeri, I.; Wolfler, A.; Zebisch, A.; Gerger, A.;  
336 Pristauz, G.; Petru, E.; White, B.; Roberts, C. E. S.; John, J. S.; Schimek, M. G.; Geigl, J. B.; Bauernhofer, T.;  
337 Sill, H.; Bock, C.; Heitzer, E.; Speicher, M. R., Inference of transcription factor binding from cell-free DNA  
338 enables tumor subtype prediction and early detection. *Nat Commun* **2019**, 10 (1), 4666.
- 339 11. Snyder, M. W.; Kircher, M.; Hill, A. J.; Daza, R. M.; Shendure, J., Cell-free DNA Comprises an In Vivo  
340 Nucleosome Footprint that Informs Its Tissues-Of-Origin. *Cell* **2016**, 164 (1-2), 57-68.
- 341 12. Mouliere, F., Enhanced detection of circulating tumor DNA by fragment size analysis. *Science*  
342 *Translational Medicine* **2018**, 10.
- 343 13. Jiang, P.; Sun, K.; Peng, W.; Cheng, S. H.; Ni, M.; Yeung, P. C.; Heung, M. M. S.; Xie, T.; Shang, H.;  
344 Zhou, Z.; Chan, R. W. Y.; Wong, J.; Wong, V. W. S.; Poon, L. C.; Leung, T. Y.; Lam, W. K. J.; Chan, J. Y. K.;  
345 Chan, H. L. Y.; Chan, K. C. A.; Chiu, R. W. K.; Lo, Y. M. D., Plasma DNA End-Motif Profiling as a Fragmentomic  
346 Marker in Cancer, Pregnancy, and Transplantation. *Cancer Discov* **2020**, 10 (5), 664-673.
- 347 14. Zhu, G.; Guo, Y. A.; Ho, D.; Poon, P.; Poh, Z. W.; Wong, P. M.; Gan, A.; Chang, M. M.; Kleftogiannis,  
348 D.; Lau, Y. T.; Tay, B.; Lim, W. J.; Chua, C.; Tan, T. J.; Koo, S. L.; Chong, D. Q.; Yap, Y. S.; Tan, I.; Ng, S.;  
349 Skanderup, A. J., Tissue-specific cell-free DNA degradation quantifies circulating tumor DNA burden. *Nat*  
350 *Commun* **2021**, 12 (1), 2229.
- 351 15. Budhraj, K. K.; McDonald, B. R.; Stephens, M. D.; Contente-Cuomo, T.; Markus, H.; Farooq, M.;  
352 Favaro, P. F.; Connor, S.; Byron, S. A.; Egan, J. B.; Ernst, B.; McDaniel, T. K.; Sekulic, A.; Tran, N. L.; Prados,  
353 M. D.; Borad, M. J.; Berens, M. E.; Pockaj, B. A.; LoRusso, P. M.; Bryce, A.; Trent, J. M.; Murtaza, M., Analysis  
354 of fragment ends in plasma DNA from patients with cancer. *medRxiv* **2021**, 2021.04.23.21255935.
- 355 16. Zhou, Z.; Cheng, S. H.; Ding, S. C.; Heung, M. M. S.; Xie, T.; Cheng, T. H. T.; Lam, W. K. J.; Peng, W.;  
356 Teoh, J. Y. C.; Chiu, P. K. F.; Ng, C. F.; Jiang, P.; Chan, K. C. A.; Chiu, R. W. K.; Lo, Y. M. D., Jagged Ends of  
357 Urinary Cell-Free DNA: Characterization and Feasibility Assessment in Bladder Cancer Detection. *Clin*  
358 *Chem* **2021**, 67 (4), 621-630.
- 359 17. Markus, H.; Chandrananda, D.; Moore, E.; Mouliere, F.; Morris, J.; Brenton, J. D.; Smith, C. G.;  
360 Rosenfeld, N., Refined characterization of circulating tumor DNA through biological feature integration.  
361 *Scientific Reports* **2022**, 12 (1), 1928.
- 362 18. Zheng, H.; Zhu, M. S.; Liu, Y., FinaleDB: a browser and database of cell-free DNA fragmentation  
363 patterns. *Bioinformatics* **2021**, 37 (16), 2502-2503.
- 364 19. Budhraj, K. K.; McDonald, B. R.; Stephens, M. D.; Contente-Cuomo, T.; Markus, H.; Farooq, M.;  
365 Favaro, P. F.; Connor, S.; Byron, S. A.; Egan, J. B.; Ernst, B.; McDaniel, T. K.; Sekulic, A.; Tran, N. L.; Prados,  
366 M. D.; Borad, M. J.; Berens, M. E.; Pockaj, B. A.; LoRusso, P. M.; Bryce, A.; Trent, J. M.; Murtaza, M., Analysis  
367 of fragment ends in plasma DNA from patients with cancer. *medRxiv* **2021**.

- 368 20. Moldovan, N.; van der Pol, Y.; van den Ende, T.; Boers, D.; Verkuijlen, S.; Creemers, A.; Ramaker,  
369 J.; Vu, T.; Fransen, M. F.; Pegtel, M.; Bahce, I.; van Laarhoven, H.; Mouliere, F., Genome-wide cell-free DNA  
370 termini in patients with cancer. *medRxiv* **2021**.
- 371 21. Kaufman, S.; Rosset, S.; Perlich, C.; Stitelman, O., Leakage in data mining: Formulation, detection,  
372 and avoidance. *ACM Trans. Knowl. Discov. Data* **December 2012**, 6 (4), 1-21.
- 373 22. Venkatraman, E. S., A Permutation Test to Compare Receiver Operating Characteristic Curves.  
374 *Biometrics* **2000**, 56 (4), 1134-1138.
- 375 23. Gu, W.; Pepe, M., Measures to Summarize and Compare the Predictive Capacity of Markers. *The*  
376 *International Journal of Biostatistics* **2009**, 5 (1).
- 377 24. Jiang, P.; Chan, C. W.; Chan, K. C.; Cheng, S. H.; Wong, J.; Wong, V. W.; Wong, G. L.; Chan, S. L.;  
378 Mok, T. S.; Chan, H. L.; Lai, P. B.; Chiu, R. W.; Lo, Y. M., Lengthening and shortening of plasma DNA in  
379 hepatocellular carcinoma patients. *Proc Natl Acad Sci U S A* **2015**, 112 (11), E1317-25.
- 380 25. Han, D. S. C.; Ni, M.; Chan, R. W. Y.; Chan, V. W. H.; Lui, K. O.; Chiu, R. W. K.; Lo, Y. M. D., The  
381 Biology of Cell-free DNA Fragmentation and the Roles of DNASE1, DNASE1L3, and DFFB. *The American*  
382 *Journal of Human Genetics* **2020**, 106 (2), 202-214.
- 383 26. Serpas, L.; Chan Rebecca, W. Y.; Jiang, P.; Ni, M.; Sun, K.; Rashidfarrokhi, A.; Soni, C.; Sisirak, V.;  
384 Lee, W.-S.; Cheng Suk, H.; Peng, W.; Chan, K. C. A.; Chiu Rossa, W. K.; Reizis, B.; Lo, Y. M. D., Dnase13  
385 deletion causes aberrations in length and end-motif frequencies in plasma DNA. *Proceedings of the*  
386 *National Academy of Sciences* **2019**, 116 (2), 641-649.
- 387 27. Widlak, P.; Li, P.; Wang, X.; Garrard, W. T., Cleavage preferences of the apoptotic endonuclease  
388 DFF40 (caspase-activated DNase or nuclease) on naked DNA and chromatin substrates. *J Biol Chem* **2000**,  
389 275 (11), 8226-32.
- 390 28. D'Arcy, M. S., Cell death: a review of the major forms of apoptosis, necrosis and autophagy. *Cell*  
391 *Biology International* **2019**, 43 (6), 582-592.
- 392 29. Klemm, S. L.; Shipony, Z.; Greenleaf, W. J., Chromatin accessibility and the regulatory epigenome.  
393 *Nat Rev Genet* **2019**, 20 (4), 207-220.
- 394 30. Corces, M. R.; Granja Jeffrey, M.; Shams, S.; Louie Bryan, H.; Seoane Jose, A.; Zhou, W.; Silva Tiago,  
395 C.; Groeneveld, C.; Wong Christopher, K.; Cho Seung, W.; Satpathy Ansuman, T.; Mumbach Maxwell, R.;  
396 Hoadley Katherine, A.; Robertson, A. G.; Sheffield Nathan, C.; Felau, I.; Castro Mauro, A. A.; Berman  
397 Benjamin, P.; Staudt Louis, M.; Zenklusen Jean, C.; Laird Peter, W.; Curtis, C.; null, n.; Greenleaf William,  
398 J.; Chang Howard, Y.; Akbani, R.; Benz Christopher, C.; Boyle Evan, A.; Broom Bradley, M.; Cherniack  
399 Andrew, D.; Craft, B.; Demchok John, A.; Doane Ashley, S.; Elemento, O.; Ferguson Martin, L.; Goldman  
400 Mary, J.; Hayes, D. N.; He, J.; Hinoue, T.; Imielinski, M.; Jones Steven, J. M.; Kemal, A.; Knijnenburg Theo,  
401 A.; Korkut, A.; Lin, D.-C.; Liu, Y.; Mensah Michael, K. A.; Mills Gordon, B.; Reuter Vincent, P.; Schultz, A.;  
402 Shen, H.; Smith Jason, P.; Tarnuzzer, R.; Trefflich, S.; Wang, Z.; Weinstein John, N.; Westlake Lindsay, C.;  
403 Xu, J.; Yang, L.; Yau, C.; Zhao, Y.; Zhu, J., The chromatin accessibility landscape of primary human cancers.  
404 *Science* **2018**, 362 (6413), eaav1898.
- 405 31. Thurman, R. E.; Rynes, E.; Humbert, R.; Vierstra, J.; Maurano, M. T.; Haugen, E.; Sheffield, N. C.;  
406 Stergachis, A. B.; Wang, H.; Vernot, B.; Garg, K.; John, S.; Sandstrom, R.; Bates, D.; Boatman, L.; Canfield,  
407 T. K.; Diegel, M.; Dunn, D.; Ebersol, A. K.; Frum, T.; Giste, E.; Johnson, A. K.; Johnson, E. M.; Kutayavin, T.;  
408 Lajoie, B.; Lee, B.-K.; Lee, K.; London, D.; Lotakis, D.; Neph, S.; Neri, F.; Nguyen, E. D.; Qu, H.; Reynolds, A.  
409 P.; Roach, V.; Safi, A.; Sanchez, M. E.; Sanyal, A.; Shafer, A.; Simon, J. M.; Song, L.; Vong, S.; Weaver, M.;  
410 Yan, Y.; Zhang, Z.; Zhang, Z.; Lenhard, B.; Tewari, M.; Dorschner, M. O.; Hansen, R. S.; Navas, P. A.;  
411 Stamatoyannopoulos, G.; Iyer, V. R.; Lieb, J. D.; Sunyaev, S. R.; Akey, J. M.; Sabo, P. J.; Kaul, R.; Furey, T. S.;  
412 Dekker, J.; Crawford, G. E.; Stamatoyannopoulos, J. A., The accessible chromatin landscape of the human  
413 genome. *Nature* **2012**, 489 (7414), 75-82.

- 414 32. Devonshire, A. S.; Whale, A. S.; Gutteridge, A.; Jones, G.; Cowen, S.; Foy, C. A.; Huggett, J. F.,  
415 Towards standardisation of cell-free DNA measurement in plasma: controls for extraction efficiency,  
416 fragment size bias and quantification. *Analytical and Bioanalytical Chemistry* **2014**, *406* (26), 6499-6512.
- 417 33. Warton, K.; Graham, L.-J.; Yuwono, N.; Samimi, G., Comparison of 4 commercial kits for the  
418 extraction of circulating DNA from plasma. *Cancer Genetics* **2018**, *228-229*, 143-150.
- 419 34. Diefenbach, R. J.; Lee, J. H.; Kefford, R. F.; Rizos, H., Evaluation of commercial kits for purification  
420 of circulating free DNA. *Cancer Genetics* **2018**, *228-229*, 21-27.
- 421 35. Page, K.; Guttery, D. S.; Zahra, N.; Primrose, L.; Elshaw, S. R.; Pringle, J. H.; Blighe, K.; Marchese, S.  
422 D.; Hills, A.; Woodley, L.; Stebbing, J.; Coombes, R. C.; Shaw, J. A., Influence of Plasma Processing on  
423 Recovery and Analysis of Circulating Nucleic Acids. *PLOS ONE* **2013**, *8* (10), e77963.
- 424 36. Cohen, J. D.; Douville, C.; Dudley, J. C.; Mog, B. J.; Popoli, M.; Ptak, J.; Dobbyn, L.; Silliman, N.;  
425 Schaefer, J.; Tie, J.; Gibbs, P.; Tomasetti, C.; Papadopoulos, N.; Kinzler, K. W.; Vogelstein, B., Detection of  
426 low-frequency DNA variants by targeted sequencing of the Watson and Crick strands. *Nature*  
427 *biotechnology* **2021**, *39* (10), 1220-1227.
- 428 37. Martin, M., Cutadapt removes adapter sequences from high-throughput sequencing reads.  
429 *EMBnet.journal; Vol 17, No 1: Next Generation Sequencing Data Analysis* **2011**.
- 430 38. Langmead, B.; Salzberg, S. L., Fast gapped-read alignment with Bowtie 2. *Nature methods* **2012**, *9*  
431 (4), 357-359.
- 432 39. Quinlan, A. R.; Hall, I. M., BEDTools: a flexible suite of utilities for comparing genomic features.  
433 *Bioinformatics* **2010**, *26* (6), 841-842.
- 434
